# Supplementary material
Source: MDPI journal article supplement (https://www.mdpi.com/2073-4395/9/9/559)
Supplement: s1 [file s1]

(A)

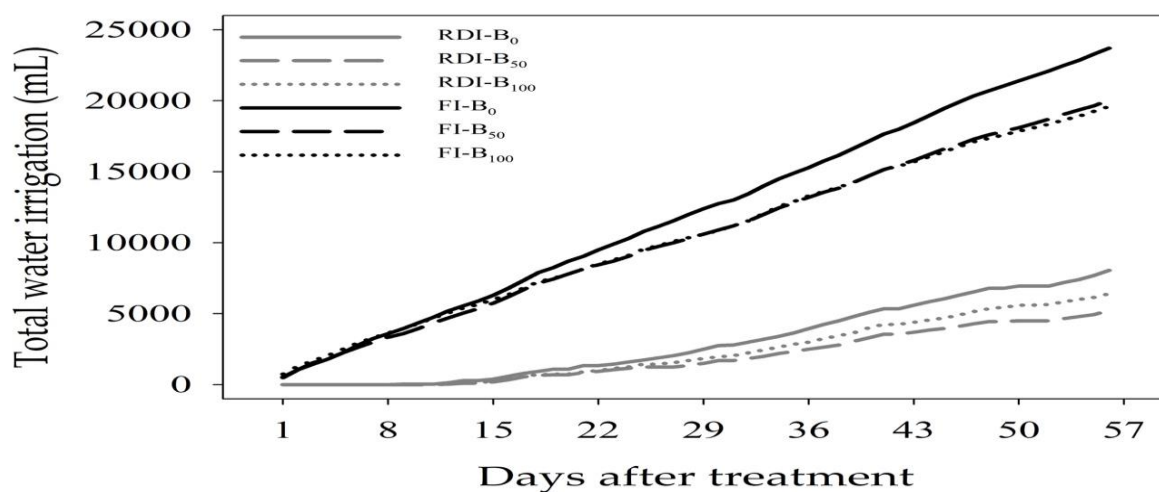

(B)

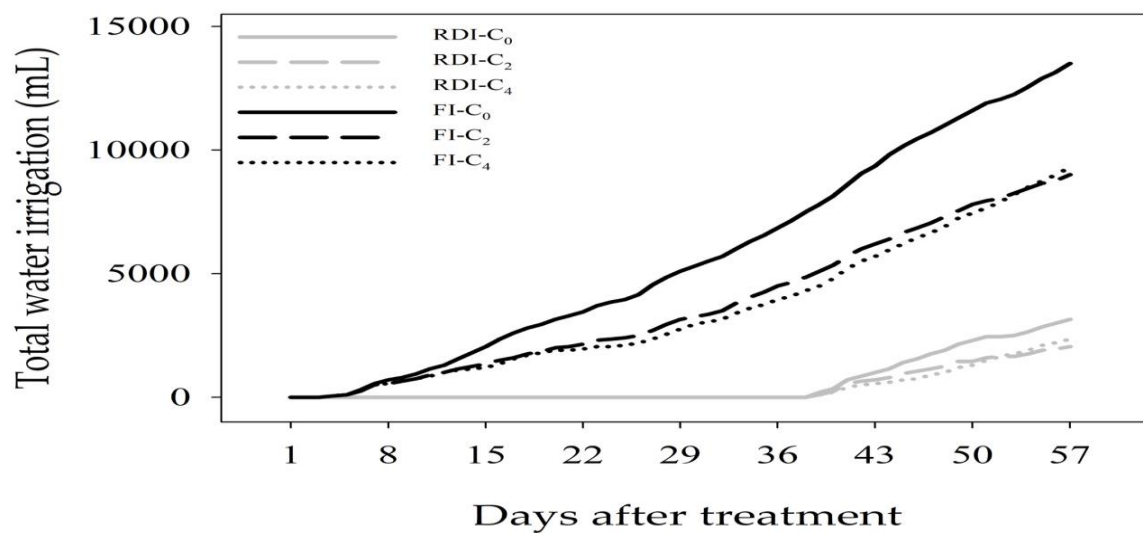

(C)

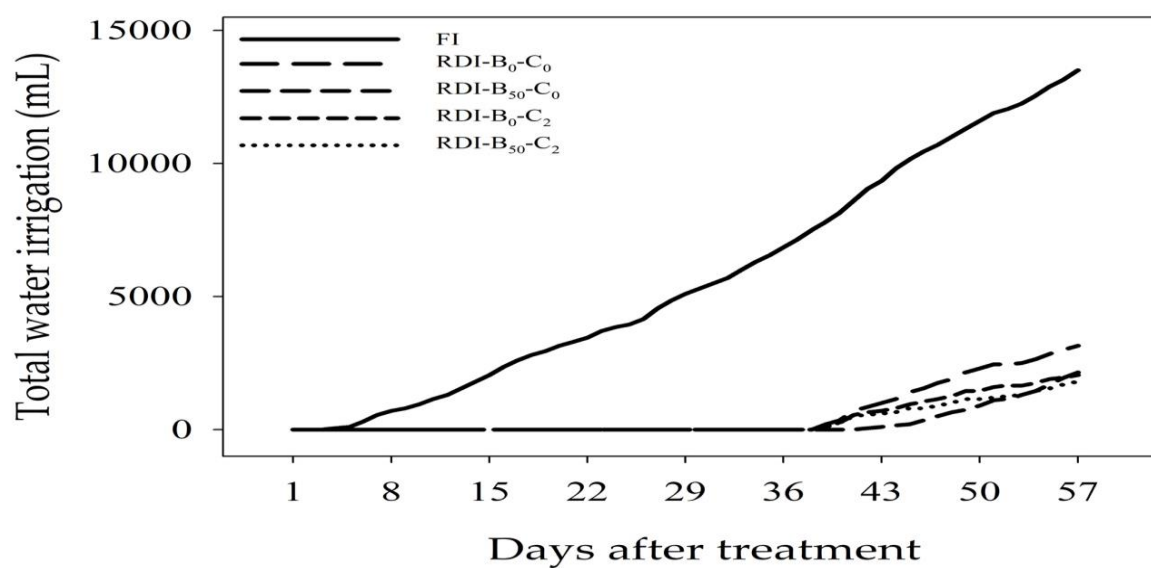

Fig. S1. The total amount of water applied to *Zea. mays* 'White Pearl' from the first day up to the 56<sup>th</sup> day under FI and RDI with different concentrations of betaine (A), chitin (B), and betaine and chitin (C). Betaine (0, 50, and 100 mM/plant) was foliage-treated, but chitin (0, 2, and 4 g/kg) was applied to the soil.
